# Supplementary material for: A model of pulldown alignments from SssI-treated DNA improves DNA methylation prediction
Source: BMC Bioinformatics. 2019 Aug 19;20:431. doi: 10.1186/s12859-019-3011-2 (PMC6700779; doi:10.1186/s12859-019-3011-2)
Supplement: Supplementary file 1 — Standard deviation calculation on MBD pulldown scale factors. Table S1 giving the details of the per-chromosome sub-sampling process to calculate a sample-to-sample standard deviation on the MBD pulldown scale factors listed in Table 1. The per-chromosome read alignment counts, per number of well-separated CpGs, in each data set (Pulldown and Background Control) are shown at top, with the resulting calculation of Cn values on each chromosome, the chromosome-averaged \documentclass[12pt]{minimal} \usepackage{amsmath} \usepackage{wasysym} \usepackage{amsfonts} \usepackage{amssymb} \usepackage{amsbsy} \usepackage{mathrsfs} \usepackage{upgreek} \setlength{\oddsidemargin}{-69pt} \begin{document}$C_{n}^{*}$\end{document}Cn∗ values, the per-chromosome calculation of fluctuations around this average (\documentclass[12pt]{minimal} \usepackage{amsmath} \usepackage{wasysym} \usepackage{amsfonts} \usepackage{amssymb} \usepackage{amsbsy} \usepackage{mathrsfs} \usepackage{upgreek} \setlength{\oddsidemargin}{-69pt} \begin{document}$(C_{n} - C_{n}^{*})^{2}$\end{document}(Cn−Cn∗)2), and finally the standard deviation sss on each Cn. (XLSX 26 kb) [file 12859_2019_3011_MOESM1_ESM.xlsx]

## Sheet: Chromosome sub-sampling
#CpG:	0	1	2	3	4	5	6	7
C_n* (calculated from totals)	1	1.48913	5.46771	32.305	124.689	207.278	233.168	259.713
C_n* (weighted by chromosome total)	1	1.48771	5.46672	32.3302	124.581	206.904	244.594	300.846
Number of samples		24	24	24	24	24	23	22
std. dev. (sample-to-sample)		0.0251105	0.125052	0.724933	4.09941	10.0283	47.2382	244.486
% sample-to-sample uncertainty		0.0168786	0.0228751	0.0224228	0.0329054	0.0484683	0.193129	0.812661
Pulldown - frequencies											Background Control - frequencies
#CpG:	0	1	2	3	4	5	6	7	Total		#CpG:	0	1	2	3	4	5	6	7	Total
chr1	65502	32867	23225	21207	12159	2852	430	66	158308		chr1	3107124	1051226	203050	31202	4565	683	79	12	4397941
chr2	76591	38509	26972	24216	12794	2693	412	65	182252		chr2	3646241	1239274	234364	35454	4946	593	80	9	5160961
chr3	67131	33005	22489	19006	9326	1852	240	36	153085		chr3	3246993	1083000	197303	28267	3683	417	40	5	4559708
chr4	70659	33216	21302	16795	7937	1453	186	17	151565		chr4	3473933	1087403	186221	24901	3147	346	38	3	4775992
chr5	60810	29563	19467	16743	8165	1770	232	36	136786		chr5	2938520	964983	174166	24700	3023	402	39	8	4105841
chr6	56750	27939	19051	16298	8673	1868	305	46	130930		chr6	2739323	896525	165079	24245	3295	465	76	11	3829019
chr7	45652	23148	16228	14518	7908	1813	253	47	109567		chr7	2193663	740469	140916	21215	3083	427	46	9	3099828
chr8	45430	22871	15913	14910	7843	1628	220	10	108825		chr8	2198777	745008	142866	21902	2978	376	50	0	3111957
chr9	31853	16640	11502	10752	5666	1365	244	24	78046		chr9	1536822	532901	105004	15785	2184	304	38	3	2193041
chr10	35417	18879	14061	14535	8512	1934	252	48	93638		chr10	1652769	594164	122619	21084	3199	430	74	10	2394349
chr11	38408	19493	13804	12173	6710	1431	250	27	92296		chr11	1851466	630872	120505	18489	2497	313	42	5	2624189
chr12	40487	19997	14292	12537	6971	1533	288	18	96123		chr12	1918271	647365	123308	18443	2619	341	67	7	2710421
chr13	34593	16953	11591	9640	4813	1083	150	14	78837		chr13	1676856	547490	99228	14298	1889	285	42	4	2340092
chr14	27268	13234	9487	8725	4659	1111	187	25	64696		chr14	1296058	434797	84028	13171	1755	264	28	1	1830102
chr15	19988	11119	8556	8347	5017	1055	145	12	54239		chr15	936680	350596	74387	12234	1930	232	27	3	1376089
chr16	14405	8777	7313	8618	5458	1369	258	39	46237		chr16	649160	269212	63813	12332	1986	307	61	5	996876
chr17	13784	8427	6936	7783	5354	1396	255	43	43978		chr17	607222	245041	57874	11175	1957	322	61	8	923660
chr18	24123	12673	8980	8263	4566	988	149	15	59757		chr18	1151070	402581	79532	12208	1833	233	32	8	1647497
chr19	6371	4109	3684	4626	3357	953	205	31	23336		chr19	253047	108104	29066	6214	1245	192	51	3	397922
chr20	13287	7663	6218	6712	4428	1053	212	32	39605		chr20	612516	243300	54884	10019	1619	245	25	1	922609
chr21	9853	5466	3963	3678	2155	520	87	11	25733		chr21	453039	163029	32758	5347	822	102	18	7	655122
chr22	4286	2991	2913	3468	2764	801	121	16	17360		chr22	179517	83629	23095	5027	968	157	19	3	292415
chrX	43634	21282	13958	10104	3956	776	80	14	93804		chrX	1623834	535415	92914	11938	1274	147	13	1	2265536
chrY	786	496	292	146	92	55	4	1	1872		chrY	56093	17794	3225	427	38	15	0	0	77592
chrM	0	21	90	92	1	0	0	0	204		chrM	0	227	423	273	0	0	0	0	923
Total	847068	429338	302287	273892	149284	33352	5165	693	2041079		Total	39998994	13614405	2610628	400350	56535	7598	1046	126	56689682
C_n by chromosome	#CpG:	1	2	3	4	5	6	7			Weights	by chromosome total
chr1		1.48309	5.42571	32.2404	126.346	198.076	258.194	260.896			chr1	0.0775801
chr2		1.47932	5.47886	32.5166	123.146	216.197	245.174	343.826			chr2	0.0909798
chr3		1.47404	5.51309	32.5214	122.476	214.814	290.208	348.25			chr3	0.0802456
chr4		1.5018	5.624	33.1602	123.998	206.464	240.649	278.6			chr4	0.0839024
chr5		1.48041	5.40119	32.7559	130.518	212.765	287.46	217.453			chr5	0.07224
chr6		1.50427	5.57062	32.4481	127.055	193.91	193.715	201.856			chr6	0.0674268
chr7		1.50216	5.53369	32.8832	123.255	204.023	264.285	250.937			chr7	0.0546469
chr8		1.48581	5.3909	32.9482	127.466	209.558	212.957				chr8	0.0548408
chr9		1.50654	5.28495	32.8638	125.169	216.637	309.799	385.979			chr9	0.0386702
chr10		1.48277	5.35129	32.1708	124.17	209.888	158.917	223.997			chr10	0.0423634
chr11		1.48947	5.52197	31.7379	129.538	220.389	286.936	260.308			chr11	0.0462541
chr12		1.46356	5.49156	32.2075	126.111	213.001	203.663	121.834			chr12	0.0477875
chr13		1.50099	5.66232	32.682	123.507	184.201	173.121	169.658			chr13	0.0411875
chr14		1.44669	5.36631	31.486	126.179	200.024	317.435	1188.26			chr14	0.0322631
chr15		1.48621	5.39009	31.973	121.817	213.101	251.667	187.448			chr15	0.0243545
chr16		1.46923	5.16446	31.4928	123.849	200.957	190.602	351.506			chr16	0.0177613
chr17		1.51498	5.27956	30.6812	120.52	190.986	184.155	236.783			chr17	0.0164761
chr18		1.50209	5.38772	32.2971	118.862	202.335	222.181	89.4688			chr18	0.0290697
chr19		1.50969	5.03417	29.5684	107.097	197.145	159.653	410.425			chr19	0.00717284
chr20		1.45194	5.2227	30.8829	126.081	198.131	390.919	1475.16			chr20	0.0163838
chr21		1.5416	5.56255	31.6278	120.543	234.407	222.236	72.254			chr21	0.011593
chr22		1.498	5.28294	28.8951	119.596	213.691	266.738	223.384			chr22	0.00527459
chrX		1.47924	5.5906	31.4977	115.559	196.454	229.015	521.008			chrX	0.0401729
chrY		1.98927	6.46159	24.4012	172.779	261.672					chrY	0.00135305
(C_n-C_n*)^2	#CpG:	1	2	3	4	5	6	7
chr1		2.13225e-05	0.00168185	0.00806037	3.11322	77.9283	184.957	1596.07
chr2		7.03573e-05	0.000147219	0.0347321	2.06089	86.3536	0.337072	1847.23
chr3		0.000186827	0.00214948	0.0365539	4.43183	62.5703	2080.67	2247.07
chr4		0.000198417	0.0247377	0.688888	0.340782	0.194097	15.5638	494.887
chr5		5.3256e-05	0.00429477	0.18124	35.2471	34.3534	1837.5	6954.39
chr6		0.000274261	0.0107941	0.0139022	6.11777	168.835	2588.62	9799.02
chr7		0.000208873	0.00448459	0.30578	1.76046	8.29859	387.755	2490.9
chr8		3.6153e-06	0.00574839	0.38197	8.32334	7.04486	1000.9
chr9		0.00035451	0.0330418	0.284728	0.34534	94.7251	4251.68	7247.49
chr10		2.44221e-05	0.0133237	0.0253984	0.16904	8.90564	7340.56	5905.87
chr11		3.09665e-06	0.00305213	0.350826	24.5698	181.833	1792.86	1643.35
chr12		0.000583276	0.000617142	0.0150685	2.34038	37.1745	1675.32	32045.4
chr13		0.000176387	0.0382574	0.123791	1.15453	515.449	5108.36	17210.3
chr14		0.00168251	0.010082	0.712648	2.55184	47.3417	5305.85	787501
chr15		2.24278e-06	0.00587326	0.127575	7.64097	38.4064	50.0309	12859.1
chr16		0.000341437	0.0913628	0.701232	0.536375	35.3663	2915.06	2566.43
chr17		0.000743609	0.0350294	2.71938	16.4939	253.384	3652.88	4104.1
chr18		0.000206866	0.00624172	0.00109566	32.7096	20.8753	502.333	44680.5
chr19		0.00048318	0.187101	7.62754	305.721	95.2455	7214.91	12007.5
chr20		0.00127979	0.0595447	2.09471	2.25005	76.9653	21411	1.37902e+06
chr21		0.00290427	0.0091826	0.493414	16.3078	756.398	499.878	52254.5
chr22		0.000105977	0.0337749	11.8002	24.8563	46.0616	490.379	6000.41
chrX		7.17369e-05	0.0153463	0.69313	81.4062	109.205	242.706	48471.3
chrY		0.251565	0.989757	62.8693	2322.98	2999.54
